# Supplementary material
Source: PubMed Central journal article supplement (PMC2797232)
Supplement: supp_M109.025882_jbc.M109.025882-1.pdf [file supp_M109.025882_jbc.M109.025882-1.pdf]

**Table 1: MS/MS identification of PARP-1 and Mitofilin in PARP-1 immunoprecipitated sample.**

The peptide list resulting from MS analysis of PARP-1 immunoprecipitation are reported.

| Protein Name                                                                                     | Accession No.<br>(P09874) | Protein Score | Protein Score | Protein C. I. %   | Total Ion Score        | Total Ion C. I. % | Protein MW | rotein PI              | Pep. Count | MS Ion Intensity |
|--------------------------------------------------------------------------------------------------|---------------------------|---------------|---------------|-------------------|------------------------|-------------------|------------|------------------------|------------|------------------|
| Poly [ADP-ribose] polymerase-1 (EC 2.4.2.30)<br>(PARP-1) (ADPRT) (NAD(+)) ADP-ribosyltransferase | PPOL_HUMAN                | 242           | 100           | 100               | 203                    | 100               | 113679,6   | 8,99                   | 20         | 6538193          |
| Peptide Information                                                                              |                           |               |               |                   |                        |                   |            |                        |            |                  |
| Calc. Mass                                                                                       | Obsrv. Mass               | ± da ± ppm    | Start Seq.    | End Sequence Seq. |                        | Ion Score         | C. I. %    | Modification           |            |                  |
| 823,4645                                                                                         | 823,4717                  | 0,0072        | 9             | 852               | 857 QLHNRR             |                   |            |                        |            |                  |
| 829,489                                                                                          | 829,4863                  | -0,0027       | -3            | 131               | 137 IEKGQVR            |                   |            |                        |            |                  |
| 868,4788                                                                                         | 868,4811                  | 0,0023        | 3             | 858               | 864 LLWHGSR            |                   |            |                        |            |                  |
| 868,4788                                                                                         | 868,4811                  | 0,0023        | 3             | 858               | 864 LLWHGSR            | 32                | 99,589     |                        |            |                  |
| 897,4828                                                                                         | 897,4891                  | 0,0063        | 7             | 629               | 635 NFKYPK             |                   |            |                        |            |                  |
| 1024,5798                                                                                        | 1024,5881                 | 0,0083        | 8             | 857               | 864 RLLWHGSR           |                   |            |                        |            |                  |
| 1066,5891                                                                                        | 1066,6002                 | 0,0111        | 10            | 486               | 495 AEPVEVVAPR         |                   |            |                        |            |                  |
| 1066,5891                                                                                        | 1066,6002                 | 0,0111        | 10            | 486               | 495 AEPVEVVAPR         | 52                | 99,996     |                        |            |                  |
| 1146,5499                                                                                        | 1146,5647                 | 0,0148        | 13            | 893               | 902 GIYFADMVSK         |                   |            | Oxidation (M)[7]       |            |                  |
| 1184,631                                                                                         | 1184,6501                 | 0,0191        | 16            | 337               | 345 EFREISYLK          |                   |            |                        |            |                  |
| 1185,5786                                                                                        | 1185,608                  | 0,0294        | 25            | 108               | 118 TLGDFAAEYAK        |                   |            |                        |            |                  |
| 1193,556                                                                                         | 1193,5782                 | 0,0222        | 19            | 156               | 164 WYHPGCFVK          |                   |            | Carbamidomethyl (C)[6] |            |                  |
| 1259,6011                                                                                        | 1259,6216                 | 0,0205        | 16            | 674               | 683 MIFDVESMKK         |                   |            | Oxidation (M)[1,8]     |            |                  |
| 1291,6311                                                                                        | 1291,657                  | 0,0259        | 20            | 23                | 33 CSESIPKDSLRL        |                   |            | Carbamidomethyl (C)[1] |            |                  |
| 1361,8038                                                                                        | 1361,8291                 | 0,0253        | 19            | 551               | 563 VFSATLGLVDIVK      |                   |            |                        |            |                  |
| 1365,8464                                                                                        | 1365,8768                 | 0,0304        | 22            | 662               | 673 SKLPKPVQDLIK       |                   |            |                        |            |                  |
| 1372,7067                                                                                        | 1372,7366                 | 0,0299        | 22            | 571               | 581 LQLEDDKENR         |                   |            |                        |            |                  |
| 1377,7485                                                                                        | 1377,7858                 | 0,0373        | 27            | 865               | 877 TTNFAGILSQGLR      |                   |            |                        |            |                  |
| 1377,7485                                                                                        | 1377,7858                 | 0,0373        | 27            | 865               | 877 TTNFAGILSQGLR      | 118               | 100        |                        |            |                  |
| 1399,7175                                                                                        | 1399,751                  | 0,0335        | 24            | 269               | 281 QQVPSGESAILDR      |                   |            |                        |            |                  |
| 1499,7125                                                                                        | 1499,7551                 | 0,0426        | 28            | 65                | 77 HPDVEVDGFSELR       |                   |            |                        |            |                  |
| 1530,7758                                                                                        | 1530,8193                 | 0,0435        | 28            | 802               | 814 VVDRDSEAEIIR       |                   |            |                        |            |                  |
| 2138,1643                                                                                        | 2138,1956                 | 0,0313        | 15            | 467               | 485 SLQELFLAHLSPWGAEVK |                   |            |                        |            |                  |

| Protein Name                                              | Accession No.<br>(Q16891) | Protein Score | Protein Score C. I. % | Total Ion Score | Total Ion C. I. % | Protein MW | Protein PI | Pep. Count | MS Ion Intensity |
|-----------------------------------------------------------|---------------------------|---------------|-----------------------|-----------------|-------------------|------------|------------|------------|------------------|
| Mitochondrial inner membrane protein (Mitofilin) (p87/89) | IMMT_HUMAN                | 390           | 100                   | 290             | 100               | 84025,5    | 6,08       | 27         | 6476540,5        |

Peptide Information

| Calc. Mass | Obsrv. Mass | $\pm$ da $\pm$ ppm | Start Seq. | End Seq. | Sequence                  | Ion Score | C. I. % | Modification           |
|------------|-------------|--------------------|------------|----------|---------------------------|-----------|---------|------------------------|
| 847,3845   | 847,3862    | 0,0017             | 2          | 67       | 72 WDSHFR                 |           |         |                        |
| 914,5166   | 914,5187    | 0,0021             | 2          | 411      | 417 RIDQLNR               |           |         |                        |
| 964,521    | 964,521     | 0                  | 0          | 443      | 451 RAFDSAVAK             |           |         |                        |
| 982,5468   | 982,5515    | 0,0047             | 5          | 633      | 640 ARFYAVQK              |           |         |                        |
| 1002,5577  | 1002,5546   | -0,0031            | -3         | 276      | 284 TVEGALKER             |           |         |                        |
| 1015,5683  | 1015,5664   | -0,0019            | -2         | 719      | 726 RVAQDWLK              |           |         |                        |
| 1053,5211  | 1053,5193   | -0,0018            | -2         | 624      | 632 GVYSEETLR             |           |         |                        |
| 1053,5211  | 1053,5193   | -0,0018            | -2         | 624      | 632 GVYSEETLR             | 30        | 98,425  |                        |
| 1119,5654  | 1119,5627   | -0,0027            | -2         | 486      | 495 QAAAHTDHLR            |           |         |                        |
| 1149,5898  | 1149,5837   | -0,0061            | -5         | 517      | 525 LSEQELQFR             |           |         |                        |
| 1153,5959  | 1153,5881   | -0,0078            | -7         | 196      | 205 ERPPEEVAAR            |           |         |                        |
| 1177,6323  | 1177,6254   | -0,0069            | -6         | 709      | 718 FVNQLKGESR            |           |         |                        |
| 1177,6323  | 1177,6254   | -0,0069            | -6         | 709      | 718 FVNQLKGESR            | 27        | 96,785  |                        |
| 1235,5573  | 1235,5266   | -0,0307            | -25        | 258      | 269 AAMDNSEIAGEK          |           |         |                        |
| 1305,6909  | 1305,6836   | -0,0073            | -6         | 517      | 526 LSEQELQFR             |           |         |                        |
| 1323,6825  | 1323,6802   | -0,0023            | -2         | 111      | 122 ISSVSEVMKESK          |           |         |                        |
| 1419,6652  | 1419,6583   | -0,0069            | -5         | 67       | 77 WDSHFRESVEK            |           |         |                        |
| 1456,7754  | 1456,762    | -0,0134            | -9         | 412      | 423 IDQLNRELAEQK          |           |         |                        |
| 1522,874   | 1522,8658   | -0,0082            | -5         | 565      | 577 KAHQLWLSVEALK         |           |         |                        |
| 1525,8043  | 1525,8114   | 0,0071             | 5          | 331      | 343 LHNMIVDLDNVVK         |           |         | Oxidation (M)[4]       |
| 1527,8278  | 1527,8171   | -0,0107            | -7         | 354      | 366 VVSQYHELVVQAR         |           |         |                        |
| 1527,8278  | 1527,8171   | -0,0107            | -7         | 354      | 366 VVSQYHELVVQAR         | 62        | 99,999  | Phospho (ST)[8]        |
| 1602,8403  | 1602,8326   | -0,0077            | -5         | 565      | 577 KAHQLWLSVEALK         |           |         |                        |
| 1823,8882  | 1823,8767   | -0,0115            | -6         | 548      | 564 GIEQAVQSHAVAEER       |           |         |                        |
| 1871,996   | 1871,9846   | -0,0114            | -6         | 582      | 600 TSSAETPTIPLGSAVEAIK   |           |         |                        |
| 2065,0083  | 2065,0051   | -0,0032            | -2         | 500      | 516 VQEQLKSEFEQNLSEK      |           |         |                        |
| 2093,0732  | 2093,061    | -0,0122            | -6         | 546      | 564 LRGIEQAVQSHAVAEER     |           |         |                        |
| 2198,0723  | 2198,0654   | -0,0069            | -3         | 527      | 545 LSQEVDNFTLDINTAYAR    | 112       | 100     |                        |
| 2198,0723  | 2198,0654   | -0,0069            | -3         | 527      | 545 LSQEVDNFTLDINTAYAR    |           |         |                        |
| 2341,1306  | 2341,1362   | 0,0056             | 2          | 507      | 525 SEFEQNLSEKLSEQLQFR    |           |         |                        |
| 2354,1736  | 2354,175    | 0,0014             | 1          | 526      | 545 RLSQEVDNFTLDINTAYAR   |           |         |                        |
| 2506,1877  | 2506,187    | -0,0007            | 0          | 601      | 623 ANCSDNFTQALTAAPPELSTR | 58        | 99,998  | Carbamidomethyl (C)[3] |
| 2506,1877  | 2506,187    | -0,0007            | 0          | 601      | 623 ANCSDNFTQALTAAPPELSTR |           |         | Carbamidomethyl (C)[3] |

| Protein Name                                                 | Accession No.<br>(Q16891) | Protein Score | Protein Score | Total Ion Score | Total Ion C. I. % | Protein MW | Protein pI | Pep. Count | MS Ion Intensity |
|--------------------------------------------------------------|---------------------------|---------------|---------------|-----------------|-------------------|------------|------------|------------|------------------|
| Mitochondrial inner membrane protein<br>(Mitofilin) (p87/89) | IMMT_HUMAN                | 177           | 100           | 142             | 100               | 84025,5    | 6,08       | 17         | 9437753          |

**Peptide Information**

| Calc. Mass | Obsrv. Mass | $\pm$ da | $\pm$ ppm | Start Seq. | End Sequence Seq.        | Ion Score | C. I. % | Modification           |
|------------|-------------|----------|-----------|------------|--------------------------|-----------|---------|------------------------|
| 847,3845   | 847,3863    | 0,0018   | 2         | 67         | 72 WDSHFR                |           |         |                        |
| 914,5166   | 914,5225    | 0,0059   | 6         | 411        | 417 RIDQLNR              |           |         |                        |
| 1015,5683  | 1015,5664   | -0,0019  | -2        | 719        | 726 RVAQDWLK             |           |         |                        |
| 1037,5391  | 1037,5355   | -0,0036  | -3        | 102        | 110 KSIQSGPLK            |           |         | Phospho (ST)[2]        |
| 1053,5211  | 1053,5197   | -0,0014  | -1        | 624        | 632 GYSEETLR             |           |         |                        |
| 1149,5898  | 1149,5867   | -0,0031  | -3        | 517        | 525 LSEQELQFR            |           |         |                        |
| 1149,5898  | 1149,5867   | -0,0031  | -3        | 517        | 525 LSEQELQFR            | 14        | 52,759  |                        |
| 1153,5959  | 1153,588    | -0,0079  | -7        | 196        | 205 ERPPEEVAAR           |           |         |                        |
| 1177,6323  | 1177,6283   | -0,004   | -3        | 709        | 718 FVNQLKGESR           |           |         |                        |
| 1305,6909  | 1305,6879   | -0,003   | -2        | 517        | 526 LSEQELQFRR           |           |         |                        |
| 1527,8278  | 1527,8231   | -0,0047  | -3        | 354        | 366 VVSQYHELVVQAR        | 67        | 100     |                        |
| 1527,8278  | 1527,8231   | -0,0047  | -3        | 354        | 366 VVSQYHELVVQAR        |           |         |                        |
| 1602,8403  | 1602,8368   | -0,0035  | -2        | 565        | 577 KAHQLWLSVEALK        |           |         | Phospho (ST)[8]        |
| 1823,8882  | 1823,8872   | -0,001   | -1        | 548        | 564 GIEQAVQSHAVAEER      |           |         |                        |
| 1871,996   | 1871,9915   | -0,0045  | -2        | 582        | 600 TSSAETPTIPLGSAVEAIK  |           |         |                        |
| 2093,0732  | 2093,0774   | 0,0042   | 2         | 546        | 564 LRGIEQAVQSHAVAEER    |           |         |                        |
| 2198,0723  | 2198,0808   | 0,0085   | 4         | 527        | 545 LSQEQVDNFTLDINTAYAR  |           |         |                        |
| 2198,0723  | 2198,0808   | 0,0085   | 4         | 527        | 545 LSQEQVDNFTLDINTAYAR  | 61        | 99,999  |                        |
| 2354,1736  | 2354,1721   | -0,0015  | -1        | 526        | 545 RLSQEQVDNFTLDINTAYAR |           |         |                        |
| 2506,1877  | 2506,1926   | 0,0049   | 2         | 601        | 623 ANCDNFTQALTAAPPELTR  |           |         | Carbamidomethyl (C)[3] |
